# Supplementary material for: Human induced pluripotent stem cell-derived cardiac muscle rings for biohybrid self-beating actuator
Source: Royal Society of Chemistry journal article supplement (doi:10.1039/d4lc00276h), 2024-01-01
Supplement: d4lc00276h7.pdf [file d4lc00276h7.pdf]

Supplementary Information

**Human induced pluripotent stem cell-derived cardiac muscle rings for biohybrid self-beating actuator**

Tomohiro Morita, Minghao Nie, Shoji Takeuchi

Graduate School of Information Science and Technology, The University of Tokyo

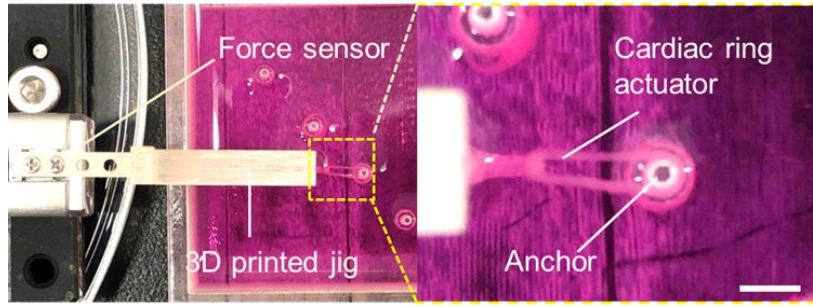

**Figure S1. Setup for measuring the contractile force of a cardiac ring.** *Scale bar; 2 mm.*

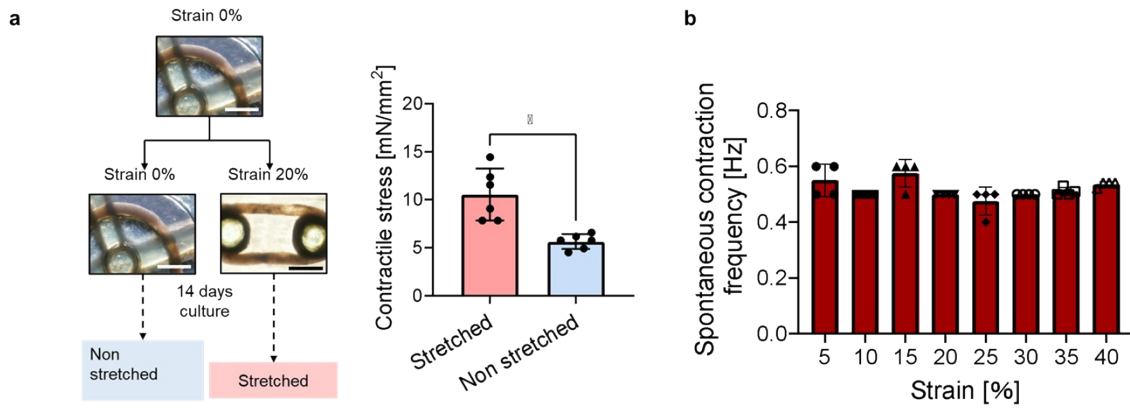

**Figure S2. Spontaneous contractile property with applied strain.** (a) A functional evaluation of cardiac muscle rings, with antagonistic muscle structures added after removal from the substrate, and those that continued cultivation within the substrate. (b) Spontaneous contractile frequency with applied strain. All scale bars; 1.5 mm.

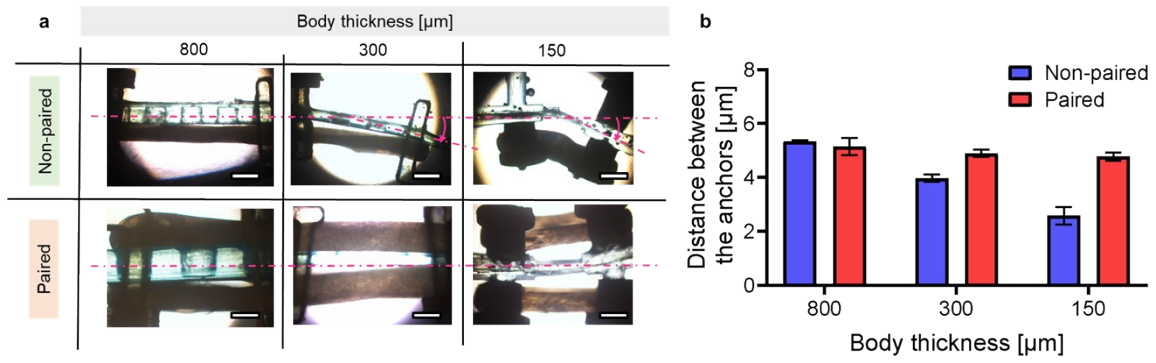

**Figure S3. Presence and absence of tension balance by antagonistic pair structure. (a)** Images of driving parts of the biohybrid self-beating actuators with and without antagonistic structure on the 5<sup>th</sup> day of culture. To observe the muscle shortening phenomenon, we verified the thickness of the PDMS body to 800, 300, and 150  $\mu\text{m}$ . **(b)** Distance between the anchors vs body thickness. All scale bars; 500  $\mu\text{m}$ .
